# Supplementary material
Source: PubMed Central journal article supplement (PMC5571288)
Supplement: AAC.00530-17_zac009176445s3.pdf [file AAC.00530-17_zac009176445s3.pdf]

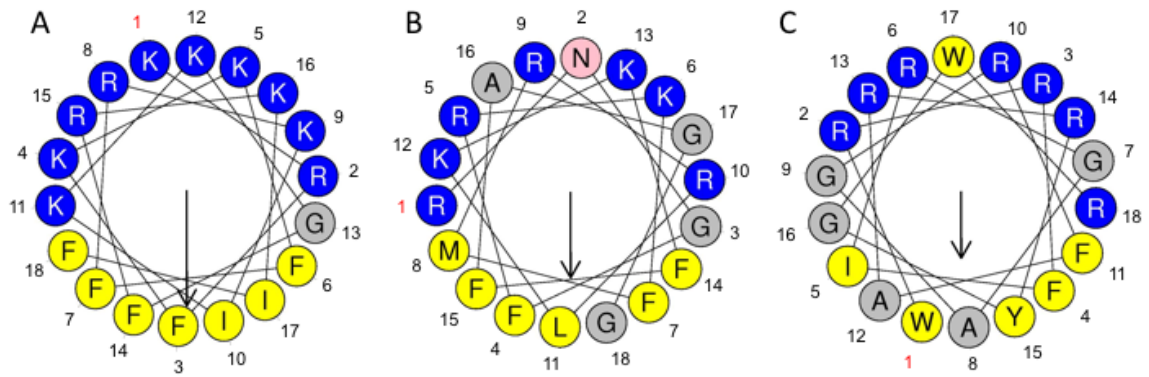

**Supplementary Figure 1.** Helical wheel projection of python cathelicidin-derived peptides. Helical wheel projection diagrams created using the synthesized amino acid sequences of  $\Delta$ Pb-CATH1 (A), Pb-CATH3 (B), and  $\Delta$ Pb-CATH4 (C). Hydrophobic amino acids are shown in yellow and grey. Hydrophilic amino acids are shown in purple and blue. The size of the arrow ( $\downarrow$ ) represents the level of hydrophobicity. The numbers correspond to the numerical order of amino acids in the synthesized peptides.

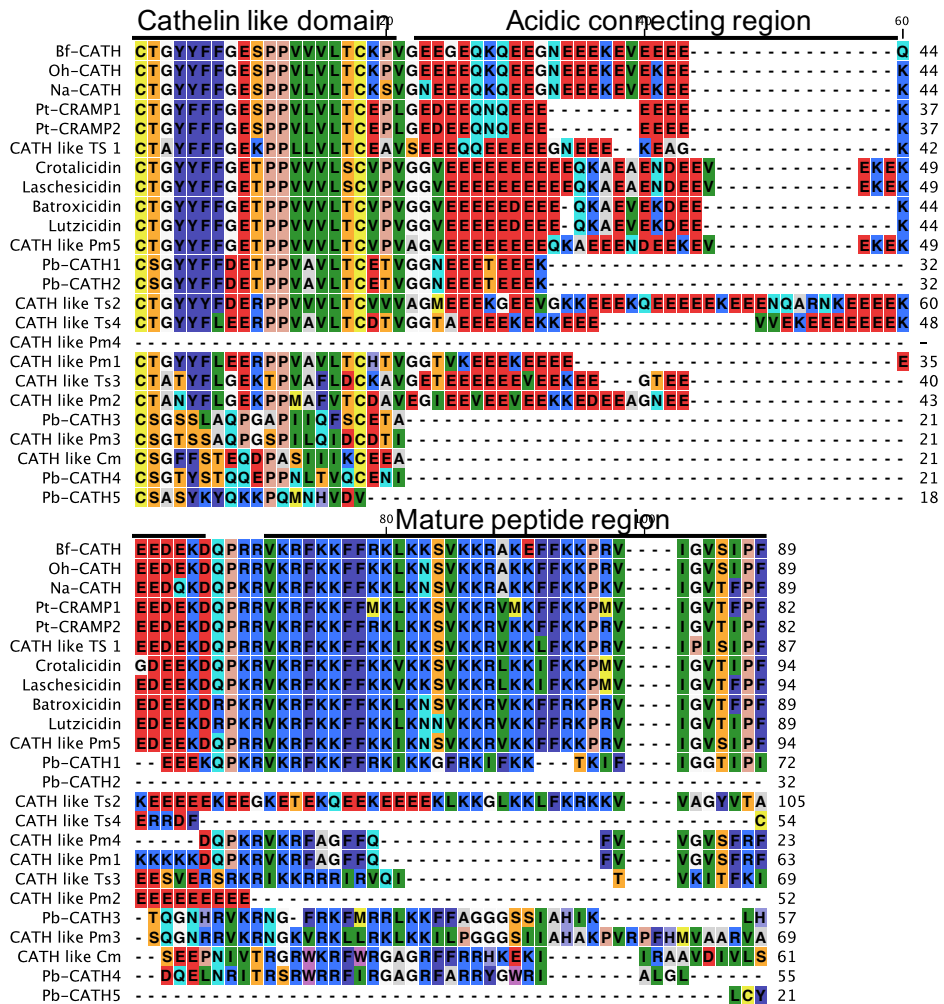

**Supplementary Figure 2.** Analysis of the sequences and structural conservation of the region corresponding to the cathelin-like domain junction and mature peptide of available snake cathelicidins. A multiple sequence alignment was generated using the corresponding sequences of all available snake cathelicidins.

Table S3. Antimicrobial activity of *Python bivittatus* cathelicidin-derived peptides against *Streptococcus iniae* from the agar disk diffusion method.

| Antimicrobial Agent     | MIC ( $\mu\text{g/ml}$ ) |              |           |
|-------------------------|--------------------------|--------------|-----------|
|                         | Susceptible              | Intermediate | Resistant |
| Pb-CATH1                | -                        | -            | $\geq 32$ |
| Pb-CATH3                | -                        | -            | $\geq 32$ |
| Pb-CATH4                | -                        | -            | $\geq 32$ |
| Ampicillin <sup>#</sup> | $\leq 0.25$              | -            | -         |
| Gentamicin <sup>#</sup> | $\leq 1$                 | -            | -         |

<sup>#</sup>Control antibiotics showed 22-23mm zone diameter at corresponding MIC. Because that CLSI susceptibility breakpoints for *S. iniae* is not available, the values of *S. agalactiae* for benzylpenicillin was adopted.
